# Supplementary material
Source: Springer Nature journal article supplement (https://www.springermedizin.de/resource/supplementary/12916_2011_392_MOESM2_ESM.pdf/9599826)

Number of encounters

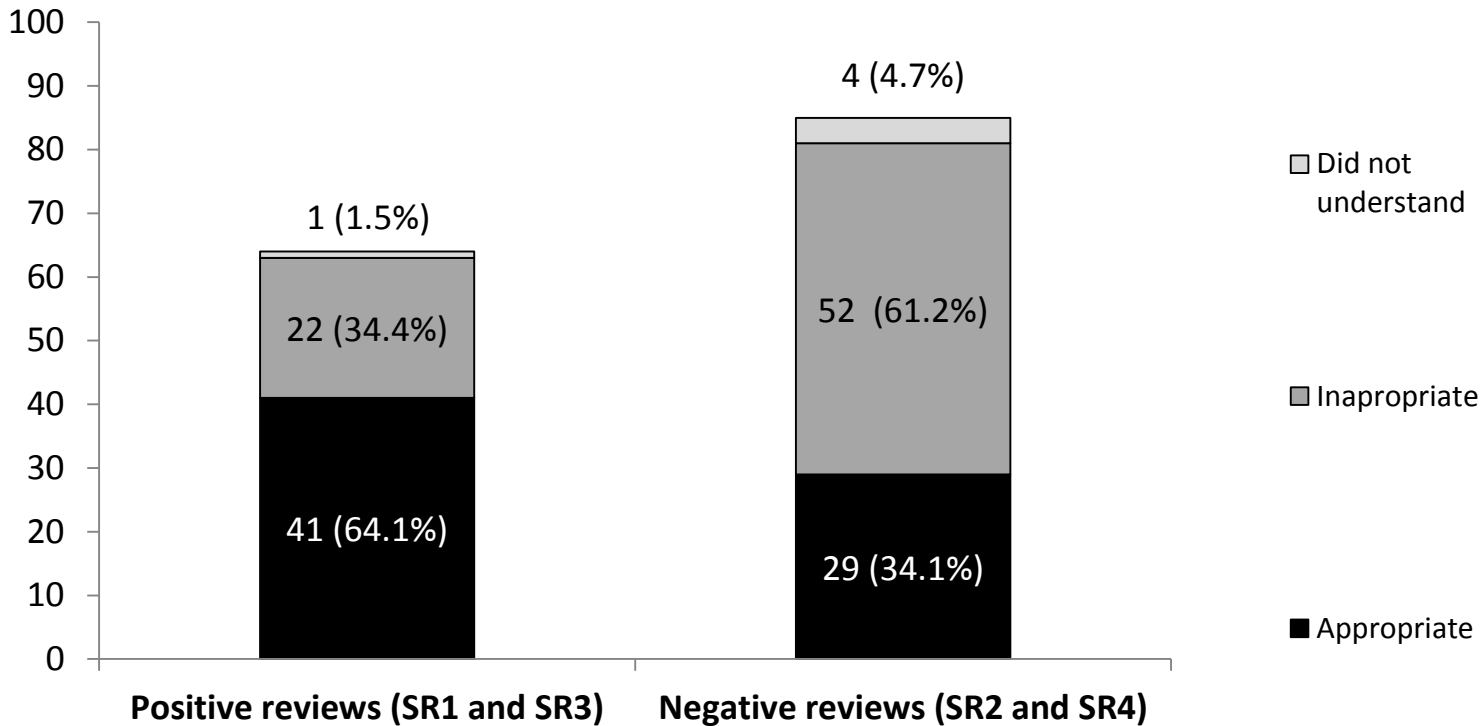

Participants with inappropriate prior beliefs

Supplement: MOESM2 [file 9599826]
